# Supplementary material for: Predicting the effect of CRISPR-Cas9-based epigenome editing
Source: eLife. 2026 Jan 12;12:RP92991. doi: 10.7554/eLife.92991 (PMC12795505; doi:10.7554/eLife.92991)
Supplement: Figure 6—source data 1. — Each row has an individual measurement which includes pertinent information used to generate in silico and compare with model predictions. Columns include corresponding guide information regarding gRNA position and coordinates as well as gene information such as orientation and coordinates. [file elife-92991-fig6-data1.xlsx]

## Sheet: Sheet1
gRNA ID	target gene	target gene ENSEMBL Transcript	target gene chromosome	target gene strand	Measurement ID	Measured fold change	gRNA target strand	gRNA start coordinate (hg38)	gRNA end coordinate (hg38)	gRNA precise position (hg38)	target gene TSS coordinates (hg38)	gRNA position wrt TSS (hg38)	gRNA Sequence
gAC172	C2CD4B	ENST00000380392.3	chr15	minus	EXP3-IR1-S1	64.5151	plus	62165428	62165447	62165447	62165285	-162	AGGTCTGCGCGAAGCTGTCG
gAC172	C2CD4B	ENST00000380392.3	chr15	minus	EXP3-IR1-S2	39.4201	plus	62165428	62165447	62165447	62165285	-162	AGGTCTGCGCGAAGCTGTCG
gAC172	C2CD4B	ENST00000380392.3	chr15	minus	EXP3-IR2-S1	19.0398	plus	62165428	62165447	62165447	62165285	-162	AGGTCTGCGCGAAGCTGTCG
gAC172	C2CD4B	ENST00000380392.3	chr15	minus	EXP3-IR2-S2	25.9372	plus	62165428	62165447	62165447	62165285	-162	AGGTCTGCGCGAAGCTGTCG
gAC172	C2CD4B	ENST00000380392.3	chr15	minus	EXP3-IR3-S1	49.126	plus	62165428	62165447	62165447	62165285	-162	AGGTCTGCGCGAAGCTGTCG
gAC172	C2CD4B	ENST00000380392.3	chr15	minus	EXP3-IR3-S2	45.1161	plus	62165428	62165447	62165447	62165285	-162	AGGTCTGCGCGAAGCTGTCG
gAC173	C2CD4B	ENST00000380392.3	chr15	minus	EXP3-IR1-S1	714.207	minus	62165394	62165413	62165394	62165285	-109	TGCAGACCTCCCGGCGTCGT
gAC173	C2CD4B	ENST00000380392.3	chr15	minus	EXP3-IR1-S2	667.495	minus	62165394	62165413	62165394	62165285	-109	TGCAGACCTCCCGGCGTCGT
gAC173	C2CD4B	ENST00000380392.3	chr15	minus	EXP3-IR2-S1	477.974	minus	62165394	62165413	62165394	62165285	-109	TGCAGACCTCCCGGCGTCGT
gAC173	C2CD4B	ENST00000380392.3	chr15	minus	EXP3-IR2-S2	461.79	minus	62165394	62165413	62165394	62165285	-109	TGCAGACCTCCCGGCGTCGT
gAC173	C2CD4B	ENST00000380392.3	chr15	minus	EXP3-IR3-S1	541.013	minus	62165394	62165413	62165394	62165285	-109	TGCAGACCTCCCGGCGTCGT
gAC173	C2CD4B	ENST00000380392.3	chr15	minus	EXP3-IR3-S2	685.39	minus	62165394	62165413	62165394	62165285	-109	TGCAGACCTCCCGGCGTCGT
gAC174	C2CD4B	ENST00000380392.3	chr15	minus	EXP3-IR1-S1	75.29	plus	62165299	62165318	62165318	62165285	-33	GCGCTCCCCTCTTATACCGT
gAC174	C2CD4B	ENST00000380392.3	chr15	minus	EXP3-IR1-S2	84.0252	plus	62165299	62165318	62165318	62165285	-33	GCGCTCCCCTCTTATACCGT
gAC174	C2CD4B	ENST00000380392.3	chr15	minus	EXP3-IR2-S1	69.296	plus	62165299	62165318	62165318	62165285	-33	GCGCTCCCCTCTTATACCGT
gAC174	C2CD4B	ENST00000380392.3	chr15	minus	EXP3-IR2-S2	54.6551	plus	62165299	62165318	62165318	62165285	-33	GCGCTCCCCTCTTATACCGT
gAC174	C2CD4B	ENST00000380392.3	chr15	minus	EXP3-IR3-S1	82.0561	plus	62165299	62165318	62165318	62165285	-33	GCGCTCCCCTCTTATACCGT
gAC174	C2CD4B	ENST00000380392.3	chr15	minus	EXP3-IR3-S2	82.8134	plus	62165299	62165318	62165318	62165285	-33	GCGCTCCCCTCTTATACCGT
gAC175	C2CD4B	ENST00000380392.3	chr15	minus	EXP3-IR1-S1	10.0327	minus	62165107	62165126	62165107	62165285	178	ACACGTGGGGGACGTTTACA
gAC175	C2CD4B	ENST00000380392.3	chr15	minus	EXP3-IR1-S2	8.45155	minus	62165107	62165126	62165107	62165285	178	ACACGTGGGGGACGTTTACA
gAC175	C2CD4B	ENST00000380392.3	chr15	minus	EXP3-IR2-S1	7.44511	minus	62165107	62165126	62165107	62165285	178	ACACGTGGGGGACGTTTACA
gAC175	C2CD4B	ENST00000380392.3	chr15	minus	EXP3-IR2-S2	12.4943	minus	62165107	62165126	62165107	62165285	178	ACACGTGGGGGACGTTTACA
gAC175	C2CD4B	ENST00000380392.3	chr15	minus	EXP3-IR3-S1	13.1198	minus	62165107	62165126	62165107	62165285	178	ACACGTGGGGGACGTTTACA
gAC175	C2CD4B	ENST00000380392.3	chr15	minus	EXP3-IR3-S2	12.6405	minus	62165107	62165126	62165107	62165285	178	ACACGTGGGGGACGTTTACA
gAC176	C2CD4B	ENST00000380392.3	chr15	minus	EXP3-IR1-S1	13.6611	minus	62165076	62165095	62165076	62165285	209	AGGGATCCAGCCGCGTCGAG
gAC176	C2CD4B	ENST00000380392.3	chr15	minus	EXP3-IR1-S2	16.7897	minus	62165076	62165095	62165076	62165285	209	AGGGATCCAGCCGCGTCGAG
gAC176	C2CD4B	ENST00000380392.3	chr15	minus	EXP3-IR2-S1	15.5705	minus	62165076	62165095	62165076	62165285	209	AGGGATCCAGCCGCGTCGAG
gAC176	C2CD4B	ENST00000380392.3	chr15	minus	EXP3-IR2-S2	15.5347	minus	62165076	62165095	62165076	62165285	209	AGGGATCCAGCCGCGTCGAG
gAC176	C2CD4B	ENST00000380392.3	chr15	minus	EXP3-IR3-S1	26.9996	minus	62165076	62165095	62165076	62165285	209	AGGGATCCAGCCGCGTCGAG
gAC176	C2CD4B	ENST00000380392.3	chr15	minus	EXP3-IR3-S2	13.309	minus	62165076	62165095	62165076	62165285	209	AGGGATCCAGCCGCGTCGAG
gAC177	CD79A	ENST00000221972.7	chr19	plus	EXP3-IR1-S1	111.248	minus	41877076	41877095	41877076	41877279	-203	GTGGCCACAATTCCCCTGAG
gAC177	CD79A	ENST00000221972.7	chr19	plus	EXP3-IR1-S2	108.805	minus	41877076	41877095	41877076	41877279	-203	GTGGCCACAATTCCCCTGAG
gAC177	CD79A	ENST00000221972.7	chr19	plus	EXP3-IR2-S1	120.664	minus	41877076	41877095	41877076	41877279	-203	GTGGCCACAATTCCCCTGAG
gAC177	CD79A	ENST00000221972.7	chr19	plus	EXP3-IR2-S2	103.98	minus	41877076	41877095	41877076	41877279	-203	GTGGCCACAATTCCCCTGAG
gAC177	CD79A	ENST00000221972.7	chr19	plus	EXP3-IR3-S1	172.891	minus	41877076	41877095	41877076	41877279	-203	GTGGCCACAATTCCCCTGAG
gAC177	CD79A	ENST00000221972.7	chr19	plus	EXP3-IR3-S2	144.978	minus	41877076	41877095	41877076	41877279	-203	GTGGCCACAATTCCCCTGAG
gAC178	CD79A	ENST00000221972.7	chr19	plus	EXP3-IR1-S1	49.8723	plus	41877128	41877147	41877147	41877279	-132	CAGCCTGAAGCATACCCGGC
gAC178	CD79A	ENST00000221972.7	chr19	plus	EXP3-IR1-S2	49.3312	plus	41877128	41877147	41877147	41877279	-132	CAGCCTGAAGCATACCCGGC
gAC178	CD79A	ENST00000221972.7	chr19	plus	EXP3-IR2-S1	41.6894	plus	41877128	41877147	41877147	41877279	-132	CAGCCTGAAGCATACCCGGC
gAC178	CD79A	ENST00000221972.7	chr19	plus	EXP3-IR2-S2	62.3152	plus	41877128	41877147	41877147	41877279	-132	CAGCCTGAAGCATACCCGGC
gAC178	CD79A	ENST00000221972.7	chr19	plus	EXP3-IR3-S1	100.005	plus	41877128	41877147	41877147	41877279	-132	CAGCCTGAAGCATACCCGGC
gAC178	CD79A	ENST00000221972.7	chr19	plus	EXP3-IR3-S2	61.1611	plus	41877128	41877147	41877147	41877279	-132	CAGCCTGAAGCATACCCGGC
gAC179	CD79A	ENST00000221972.7	chr19	plus	EXP3-IR1-S1	22.1369	plus	41877244	41877263	41877263	41877279	-16	GGGTAGGGATCTGGTACCCT
gAC179	CD79A	ENST00000221972.7	chr19	plus	EXP3-IR1-S2	16.1071	plus	41877244	41877263	41877263	41877279	-16	GGGTAGGGATCTGGTACCCT
gAC179	CD79A	ENST00000221972.7	chr19	plus	EXP3-IR2-S1	20.1357	plus	41877244	41877263	41877263	41877279	-16	GGGTAGGGATCTGGTACCCT
gAC179	CD79A	ENST00000221972.7	chr19	plus	EXP3-IR2-S2	18.675	plus	41877244	41877263	41877263	41877279	-16	GGGTAGGGATCTGGTACCCT
gAC179	CD79A	ENST00000221972.7	chr19	plus	EXP3-IR3-S1	24.2832	plus	41877244	41877263	41877263	41877279	-16	GGGTAGGGATCTGGTACCCT
gAC179	CD79A	ENST00000221972.7	chr19	plus	EXP3-IR3-S2	28.7453	plus	41877244	41877263	41877263	41877279	-16	GGGTAGGGATCTGGTACCCT
gAC180	CD79A	ENST00000221972.7	chr19	plus	EXP3-IR1-S1	2.06318	minus	41877382	41877401	41877382	41877279	103	TGCCCTTTGGCCACATACCC
gAC180	CD79A	ENST00000221972.7	chr19	plus	EXP3-IR1-S2	2.92451	minus	41877382	41877401	41877382	41877279	103	TGCCCTTTGGCCACATACCC
gAC180	CD79A	ENST00000221972.7	chr19	plus	EXP3-IR2-S1	3.02852	minus	41877382	41877401	41877382	41877279	103	TGCCCTTTGGCCACATACCC
gAC180	CD79A	ENST00000221972.7	chr19	plus	EXP3-IR2-S2	2.67012	minus	41877382	41877401	41877382	41877279	103	TGCCCTTTGGCCACATACCC
gAC180	CD79A	ENST00000221972.7	chr19	plus	EXP3-IR3-S1	3.57374	minus	41877382	41877401	41877382	41877279	103	TGCCCTTTGGCCACATACCC
gAC180	CD79A	ENST00000221972.7	chr19	plus	EXP3-IR3-S2	3.41057	minus	41877382	41877401	41877382	41877279	103	TGCCCTTTGGCCACATACCC
gAC181	CD79A	ENST00000221972.7	chr19	plus	EXP3-IR1-S1	3.99407	minus	41877508	41877527	41877508	41877279	229	ATTTCTATAGGCATCTTCCC
gAC181	CD79A	ENST00000221972.7	chr19	plus	EXP3-IR1-S2	5.35196	minus	41877508	41877527	41877508	41877279	229	ATTTCTATAGGCATCTTCCC
gAC181	CD79A	ENST00000221972.7	chr19	plus	EXP3-IR2-S1	5.06191	minus	41877508	41877527	41877508	41877279	229	ATTTCTATAGGCATCTTCCC
gAC181	CD79A	ENST00000221972.7	chr19	plus	EXP3-IR2-S2	5.43347	minus	41877508	41877527	41877508	41877279	229	ATTTCTATAGGCATCTTCCC
gAC181	CD79A	ENST00000221972.7	chr19	plus	EXP3-IR3-S1	7.49377	minus	41877508	41877527	41877508	41877279	229	ATTTCTATAGGCATCTTCCC
gAC181	CD79A	ENST00000221972.7	chr19	plus	EXP3-IR3-S2	5.16188	minus	41877508	41877527	41877508	41877279	229	ATTTCTATAGGCATCTTCCC
gAC115	CXCR4	ENST00000241393.3	chr2	minus	EXP1-IR1-S1	1.52	minus	136118110	136118129	136118110	136118149	39	AGGTAGCAAAGTGACGCCGA
gAC115	CXCR4	ENST00000241393.3	chr2	minus	EXP1-IR1-S2	1.49	minus	136118110	136118129	136118110	136118149	39	AGGTAGCAAAGTGACGCCGA
gAC115	CXCR4	ENST00000241393.3	chr2	minus	EXP1-IR2-S1	2.44	minus	136118110	136118129	136118110	136118149	39	AGGTAGCAAAGTGACGCCGA
gAC115	CXCR4	ENST00000241393.3	chr2	minus	EXP1-IR2-S2	2.32	minus	136118110	136118129	136118110	136118149	39	AGGTAGCAAAGTGACGCCGA
gAC115	CXCR4	ENST00000241393.3	chr2	minus	EXP1-IR3-S1	2.46	minus	136118110	136118129	136118110	136118149	39	AGGTAGCAAAGTGACGCCGA
gAC115	CXCR4	ENST00000241393.3	chr2	minus	EXP1-IR3-S2	1.94	minus	136118110	136118129	136118110	136118149	39	AGGTAGCAAAGTGACGCCGA
gAC127	CXCR4	ENST00000241393.3	chr2	minus	EXP2-IR1-S1	3.39	minus	136118350	136118369	136118350	136118149	-201	AGCCGGACAGGACCTCCCAG
gAC127	CXCR4	ENST00000241393.3	chr2	minus	EXP2-IR1-S2	2.01	minus	136118350	136118369	136118350	136118149	-201	AGCCGGACAGGACCTCCCAG
gAC127	CXCR4	ENST00000241393.3	chr2	minus	EXP2-IR2-S1	3.42	minus	136118350	136118369	136118350	136118149	-201	AGCCGGACAGGACCTCCCAG
gAC127	CXCR4	ENST00000241393.3	chr2	minus	EXP2-IR2-S2	4.82	minus	136118350	136118369	136118350	136118149	-201	AGCCGGACAGGACCTCCCAG
gAC127	CXCR4	ENST00000241393.3	chr2	minus	EXP2-IR3-S1	5.14	minus	136118350	136118369	136118350	136118149	-201	AGCCGGACAGGACCTCCCAG
gAC127	CXCR4	ENST00000241393.3	chr2	minus	EXP2-IR3-S2	4.37	minus	136118350	136118369	136118350	136118149	-201	AGCCGGACAGGACCTCCCAG
gAC136	CXCR4	ENST00000241393.3	chr2	minus	EXP3-IR1-S1	5.05	minus	136118309	136118328	136118309	136118149	-160	CGCAAACAGCAGGGTCCCCT
gAC136	CXCR4	ENST00000241393.3	chr2	minus	EXP3-IR1-S2	3.85	minus	136118309	136118328	136118309	136118149	-160	CGCAAACAGCAGGGTCCCCT
gAC136	CXCR4	ENST00000241393.3	chr2	minus	EXP3-IR2-S1	3.15	minus	136118309	136118328	136118309	136118149	-160	CGCAAACAGCAGGGTCCCCT
gAC136	CXCR4	ENST00000241393.3	chr2	minus	EXP3-IR2-S2	2.56	minus	136118309	136118328	136118309	136118149	-160	CGCAAACAGCAGGGTCCCCT
gAC136	CXCR4	ENST00000241393.3	chr2	minus	EXP3-IR3-S1	3.24	minus	136118309	136118328	136118309	136118149	-160	CGCAAACAGCAGGGTCCCCT
gAC136	CXCR4	ENST00000241393.3	chr2	minus	EXP3-IR3-S2	4.5	minus	136118309	136118328	136118309	136118149	-160	CGCAAACAGCAGGGTCCCCT
gAC137	CXCR4	ENST00000241393.3	chr2	minus	EXP3-IR1-S1	1.3	minus	136118193	136118212	136118193	136118149	-44	AGCGCGGCGCATGCGCCGCT
gAC137	CXCR4	ENST00000241393.3	chr2	minus	EXP3-IR1-S2	0.76	minus	136118193	136118212	136118193	136118149	-44	AGCGCGGCGCATGCGCCGCT
gAC137	CXCR4	ENST00000241393.3	chr2	minus	EXP3-IR2-S1	0.78	minus	136118193	136118212	136118193	136118149	-44	AGCGCGGCGCATGCGCCGCT
gAC137	CXCR4	ENST00000241393.3	chr2	minus	EXP3-IR2-S2	0.79	minus	136118193	136118212	136118193	136118149	-44	AGCGCGGCGCATGCGCCGCT
gAC137	CXCR4	ENST00000241393.3	chr2	minus	EXP3-IR3-S1	0.8	minus	136118193	136118212	136118193	136118149	-44	AGCGCGGCGCATGCGCCGCT
gAC137	CXCR4	ENST00000241393.3	chr2	minus	EXP3-IR3-S2	1	minus	136118193	136118212	136118193	136118149	-44	AGCGCGGCGCATGCGCCGCT
gAC138	CXCR4	ENST00000241393.3	chr2	minus	EXP3-IR1-S1	3.91	plus	136118164	136118183	136118183	136118149	-34	TTTTTATAAAAGTCCGGCCG
gAC138	CXCR4	ENST00000241393.3	chr2	minus	EXP3-IR1-S2	3.98	plus	136118164	136118183	136118183	136118149	-34	TTTTTATAAAAGTCCGGCCG
gAC138	CXCR4	ENST00000241393.3	chr2	minus	EXP3-IR2-S1	2.85	plus	136118164	136118183	136118183	136118149	-34	TTTTTATAAAAGTCCGGCCG
gAC138	CXCR4	ENST00000241393.3	chr2	minus	EXP3-IR2-S2	1.99	plus	136118164	136118183	136118183	136118149	-34	TTTTTATAAAAGTCCGGCCG
gAC138	CXCR4	ENST00000241393.3	chr2	minus	EXP3-IR3-S1	2.57	plus	136118164	136118183	136118183	136118149	-34	TTTTTATAAAAGTCCGGCCG
gAC138	CXCR4	ENST00000241393.3	chr2	minus	EXP3-IR3-S2	2.45	plus	136118164	136118183	136118183	136118149	-34	TTTTTATAAAAGTCCGGCCG
gJL111	CXCR4	ENST00000241393.3	chr2	minus	EXP2-IR1-S1	3.18	minus	136118319	136118338	136118319	136118149	-170	CCGACCACCCGCAAACAGCA
gJL111	CXCR4	ENST00000241393.3	chr2	minus	EXP2-IR1-S2	3.72	minus	136118319	136118338	136118319	136118149	-170	CCGACCACCCGCAAACAGCA
gJL111	CXCR4	ENST00000241393.3	chr2	minus	EXP2-IR2-S1	5.91	minus	136118319	136118338	136118319	136118149	-170	CCGACCACCCGCAAACAGCA
gJL111	CXCR4	ENST00000241393.3	chr2	minus	EXP2-IR2-S2	4.54	minus	136118319	136118338	136118319	136118149	-170	CCGACCACCCGCAAACAGCA
gJL111	CXCR4	ENST00000241393.3	chr2	minus	EXP2-IR3-S1	5.05	minus	136118319	136118338	136118319	136118149	-170	CCGACCACCCGCAAACAGCA
gJL111	CXCR4	ENST00000241393.3	chr2	minus	EXP2-IR3-S2	5.42	minus	136118319	136118338	136118319	136118149	-170	CCGACCACCCGCAAACAGCA
gJL111	CXCR4	ENST00000241393.3	chr2	minus	EXP3-IR1-S1	7.59	minus	136118319	136118338	136118319	136118149	-170	CCGACCACCCGCAAACAGCA
gJL111	CXCR4	ENST00000241393.3	chr2	minus	EXP3-IR1-S2	7.69	minus	136118319	136118338	136118319	136118149	-170	CCGACCACCCGCAAACAGCA
gJL111	CXCR4	ENST00000241393.3	chr2	minus	EXP3-IR2-S1	4.53	minus	136118319	136118338	136118319	136118149	-170	CCGACCACCCGCAAACAGCA
gJL111	CXCR4	ENST00000241393.3	chr2	minus	EXP3-IR2-S2	4.13	minus	136118319	136118338	136118319	136118149	-170	CCGACCACCCGCAAACAGCA
gJL111	CXCR4	ENST00000241393.3	chr2	minus	EXP3-IR3-S1	5.91	minus	136118319	136118338	136118319	136118149	-170	CCGACCACCCGCAAACAGCA
gJL111	CXCR4	ENST00000241393.3	chr2	minus	EXP3-IR3-S2	6.72	minus	136118319	136118338	136118319	136118149	-170	CCGACCACCCGCAAACAGCA
gAC182	CYP17A1	ENST00000369887.3	chr10	minus	EXP1-IR1-S1	2270.08	plus	102837625	102837644	102837644	102837413	-231	GGTCAGTTGATCACCCTCTG
gAC182	CYP17A1	ENST00000369887.3	chr10	minus	EXP1-IR1-S2	1752.71	plus	102837625	102837644	102837644	102837413	-231	GGTCAGTTGATCACCCTCTG
gAC182	CYP17A1	ENST00000369887.3	chr10	minus	EXP1-IR2-S1	5615.19	plus	102837625	102837644	102837644	102837413	-231	GGTCAGTTGATCACCCTCTG
gAC182	CYP17A1	ENST00000369887.3	chr10	minus	EXP1-IR2-S2	3364.06	plus	102837625	102837644	102837644	102837413	-231	GGTCAGTTGATCACCCTCTG
gAC182	CYP17A1	ENST00000369887.3	chr10	minus	EXP1-IR3-S1	1826.24	plus	102837625	102837644	102837644	102837413	-231	GGTCAGTTGATCACCCTCTG
gAC182	CYP17A1	ENST00000369887.3	chr10	minus	EXP1-IR3-S2	3030.52	plus	102837625	102837644	102837644	102837413	-231	GGTCAGTTGATCACCCTCTG
gAC183	CYP17A1	ENST00000369887.3	chr10	minus	EXP1-IR1-S1	672.107	plus	102837600	102837619	102837619	102837413	-206	TCCGGAGGAGGAGCTAGGTA
gAC183	CYP17A1	ENST00000369887.3	chr10	minus	EXP1-IR1-S2	740.141	plus	102837600	102837619	102837619	102837413	-206	TCCGGAGGAGGAGCTAGGTA
gAC183	CYP17A1	ENST00000369887.3	chr10	minus	EXP1-IR2-S1	847.959	plus	102837600	102837619	102837619	102837413	-206	TCCGGAGGAGGAGCTAGGTA
gAC183	CYP17A1	ENST00000369887.3	chr10	minus	EXP1-IR2-S2	991.976	plus	102837600	102837619	102837619	102837413	-206	TCCGGAGGAGGAGCTAGGTA
gAC183	CYP17A1	ENST00000369887.3	chr10	minus	EXP1-IR3-S1	1070.59	plus	102837600	102837619	102837619	102837413	-206	TCCGGAGGAGGAGCTAGGTA
gAC183	CYP17A1	ENST00000369887.3	chr10	minus	EXP1-IR3-S2	953.915	plus	102837600	102837619	102837619	102837413	-206	TCCGGAGGAGGAGCTAGGTA
gAC184	CYP17A1	ENST00000369887.3	chr10	minus	EXP1-IR1-S1	991.184	minus	102837601	102837620	102837601	102837413	-188	TTACCTAGCTCCTCCTCCGG
gAC184	CYP17A1	ENST00000369887.3	chr10	minus	EXP1-IR1-S2	790.114	minus	102837601	102837620	102837601	102837413	-188	TTACCTAGCTCCTCCTCCGG
gAC184	CYP17A1	ENST00000369887.3	chr10	minus	EXP1-IR2-S1	1505.46	minus	102837601	102837620	102837601	102837413	-188	TTACCTAGCTCCTCCTCCGG
gAC184	CYP17A1	ENST00000369887.3	chr10	minus	EXP1-IR2-S2	1408.67	minus	102837601	102837620	102837601	102837413	-188	TTACCTAGCTCCTCCTCCGG
gAC184	CYP17A1	ENST00000369887.3	chr10	minus	EXP1-IR3-S1	1502.51	minus	102837601	102837620	102837601	102837413	-188	TTACCTAGCTCCTCCTCCGG
gAC184	CYP17A1	ENST00000369887.3	chr10	minus	EXP1-IR3-S2	1303.16	minus	102837601	102837620	102837601	102837413	-188	TTACCTAGCTCCTCCTCCGG
gAC185	CYP17A1	ENST00000369887.3	chr10	minus	EXP1-IR1-S1	50.5028	plus	102837344	102837363	102837363	102837413	50	AGCCACGAGCTCCCACATGG
gAC185	CYP17A1	ENST00000369887.3	chr10	minus	EXP1-IR1-S2	57.8611	plus	102837344	102837363	102837363	102837413	50	AGCCACGAGCTCCCACATGG
gAC185	CYP17A1	ENST00000369887.3	chr10	minus	EXP1-IR2-S1	111.034	plus	102837344	102837363	102837363	102837413	50	AGCCACGAGCTCCCACATGG
gAC185	CYP17A1	ENST00000369887.3	chr10	minus	EXP1-IR2-S2	129.968	plus	102837344	102837363	102837363	102837413	50	AGCCACGAGCTCCCACATGG
gAC185	CYP17A1	ENST00000369887.3	chr10	minus	EXP1-IR3-S1	114.564	plus	102837344	102837363	102837363	102837413	50	AGCCACGAGCTCCCACATGG
gAC185	CYP17A1	ENST00000369887.3	chr10	minus	EXP1-IR3-S2	156.322	plus	102837344	102837363	102837363	102837413	50	AGCCACGAGCTCCCACATGG
gAC186	CYP17A1	ENST00000369887.3	chr10	minus	EXP1-IR1-S1	9.87561	plus	102837209	102837228	102837228	102837413	185	GTTATGCATATGGCCGTGTC
gAC186	CYP17A1	ENST00000369887.3	chr10	minus	EXP1-IR1-S2	7.58527	plus	102837209	102837228	102837228	102837413	185	GTTATGCATATGGCCGTGTC
gAC186	CYP17A1	ENST00000369887.3	chr10	minus	EXP1-IR2-S1	11.0411	plus	102837209	102837228	102837228	102837413	185	GTTATGCATATGGCCGTGTC
gAC186	CYP17A1	ENST00000369887.3	chr10	minus	EXP1-IR2-S2	8.17093	plus	102837209	102837228	102837228	102837413	185	GTTATGCATATGGCCGTGTC
gAC186	CYP17A1	ENST00000369887.3	chr10	minus	EXP1-IR3-S1	4.54572	plus	102837209	102837228	102837228	102837413	185	GTTATGCATATGGCCGTGTC
gAC186	CYP17A1	ENST00000369887.3	chr10	minus	EXP1-IR3-S2	9.06545	plus	102837209	102837228	102837228	102837413	185	GTTATGCATATGGCCGTGTC
gAC187	MYO1G	ENST00000258787.11	chr7	minus	EXP1-IR1-S1	3.24955	plus	44979217	44979236	44979236	44979015	-221	GTCTGACCCGTTTGCACGCC
gAC187	MYO1G	ENST00000258787.11	chr7	minus	EXP1-IR1-S2	1.60237	plus	44979217	44979236	44979236	44979015	-221	GTCTGACCCGTTTGCACGCC
gAC187	MYO1G	ENST00000258787.11	chr7	minus	EXP1-IR2-S1	1.03449	plus	44979217	44979236	44979236	44979015	-221	GTCTGACCCGTTTGCACGCC
gAC187	MYO1G	ENST00000258787.11	chr7	minus	EXP1-IR2-S2	1.28572	plus	44979217	44979236	44979236	44979015	-221	GTCTGACCCGTTTGCACGCC
gAC187	MYO1G	ENST00000258787.11	chr7	minus	EXP1-IR3-S1	1.44493	plus	44979217	44979236	44979236	44979015	-221	GTCTGACCCGTTTGCACGCC
gAC187	MYO1G	ENST00000258787.11	chr7	minus	EXP1-IR3-S2	0.553	plus	44979217	44979236	44979236	44979015	-221	GTCTGACCCGTTTGCACGCC
gAC188	MYO1G	ENST00000258787.11	chr7	minus	EXP1-IR1-S1	2.23665	minus	44979227	44979246	44979227	44979015	-212	CCTCGCCCCTGGCGTGCAAA
gAC188	MYO1G	ENST00000258787.11	chr7	minus	EXP1-IR1-S2	2.71021	minus	44979227	44979246	44979227	44979015	-212	CCTCGCCCCTGGCGTGCAAA
gAC188	MYO1G	ENST00000258787.11	chr7	minus	EXP1-IR2-S1	3.30969	minus	44979227	44979246	44979227	44979015	-212	CCTCGCCCCTGGCGTGCAAA
gAC188	MYO1G	ENST00000258787.11	chr7	minus	EXP1-IR2-S2	3.96482	minus	44979227	44979246	44979227	44979015	-212	CCTCGCCCCTGGCGTGCAAA
gAC188	MYO1G	ENST00000258787.11	chr7	minus	EXP1-IR3-S1	1.30086	minus	44979227	44979246	44979227	44979015	-212	CCTCGCCCCTGGCGTGCAAA
gAC188	MYO1G	ENST00000258787.11	chr7	minus	EXP1-IR3-S2	2.38522	minus	44979227	44979246	44979227	44979015	-212	CCTCGCCCCTGGCGTGCAAA
gAC189	MYO1G	ENST00000258787.11	chr7	minus	EXP1-IR1-S1	11.3212	plus	44978922	44978941	44978941	44979015	74	AGTCAGGTTTGCCATACTCA
gAC189	MYO1G	ENST00000258787.11	chr7	minus	EXP1-IR1-S2	10.3593	plus	44978922	44978941	44978941	44979015	74	AGTCAGGTTTGCCATACTCA
gAC189	MYO1G	ENST00000258787.11	chr7	minus	EXP1-IR2-S1	11.4067	plus	44978922	44978941	44978941	44979015	74	AGTCAGGTTTGCCATACTCA
gAC189	MYO1G	ENST00000258787.11	chr7	minus	EXP1-IR2-S2	9.60155	plus	44978922	44978941	44978941	44979015	74	AGTCAGGTTTGCCATACTCA
gAC189	MYO1G	ENST00000258787.11	chr7	minus	EXP1-IR3-S1	6.3156	plus	44978922	44978941	44978941	44979015	74	AGTCAGGTTTGCCATACTCA
gAC189	MYO1G	ENST00000258787.11	chr7	minus	EXP1-IR3-S2	3.67671	plus	44978922	44978941	44978941	44979015	74	AGTCAGGTTTGCCATACTCA
gAC190	MYO1G	ENST00000258787.11	chr7	minus	EXP1-IR1-S1	20.518	plus	44978799	44978818	44978818	44979015	197	GTCTCTGCGAGGACGCAAGG
gAC190	MYO1G	ENST00000258787.11	chr7	minus	EXP1-IR1-S2	26.8504	plus	44978799	44978818	44978818	44979015	197	GTCTCTGCGAGGACGCAAGG
gAC190	MYO1G	ENST00000258787.11	chr7	minus	EXP1-IR2-S1	18.0176	plus	44978799	44978818	44978818	44979015	197	GTCTCTGCGAGGACGCAAGG
gAC190	MYO1G	ENST00000258787.11	chr7	minus	EXP1-IR2-S2	16.1195	plus	44978799	44978818	44978818	44979015	197	GTCTCTGCGAGGACGCAAGG
gAC190	MYO1G	ENST00000258787.11	chr7	minus	EXP1-IR3-S1	11.1374	plus	44978799	44978818	44978818	44979015	197	GTCTCTGCGAGGACGCAAGG
gAC190	MYO1G	ENST00000258787.11	chr7	minus	EXP1-IR3-S2	11.4736	plus	44978799	44978818	44978818	44979015	197	GTCTCTGCGAGGACGCAAGG
gAC191	MYO1G	ENST00000258787.11	chr7	minus	EXP1-IR1-S1	33.7225	minus	44978795	44978814	44978795	44979015	220	GCGTCCTCGCAGAGACCTGA
gAC191	MYO1G	ENST00000258787.11	chr7	minus	EXP1-IR1-S2	38.9952	minus	44978795	44978814	44978795	44979015	220	GCGTCCTCGCAGAGACCTGA
gAC191	MYO1G	ENST00000258787.11	chr7	minus	EXP1-IR2-S1	26.1133	minus	44978795	44978814	44978795	44979015	220	GCGTCCTCGCAGAGACCTGA
gAC191	MYO1G	ENST00000258787.11	chr7	minus	EXP1-IR2-S2	29.263	minus	44978795	44978814	44978795	44979015	220	GCGTCCTCGCAGAGACCTGA
gAC191	MYO1G	ENST00000258787.11	chr7	minus	EXP1-IR3-S1	15.5022	minus	44978795	44978814	44978795	44979015	220	GCGTCCTCGCAGAGACCTGA
gAC191	MYO1G	ENST00000258787.11	chr7	minus	EXP1-IR3-S2	20.104	minus	44978795	44978814	44978795	44979015	220	GCGTCCTCGCAGAGACCTGA
gAC192	PRSS12	ENST00000296498.3	chr4	minus	EXP2-IR1-S1	1.02282	plus	118353179	118353198	118353198	118353003	-195	GCCCGCGCGGAGCACGGTCT
gAC192	PRSS12	ENST00000296498.3	chr4	minus	EXP2-IR1-S2	1.12588	plus	118353179	118353198	118353198	118353003	-195	GCCCGCGCGGAGCACGGTCT
gAC192	PRSS12	ENST00000296498.3	chr4	minus	EXP2-IR2-S1	1.5091	plus	118353179	118353198	118353198	118353003	-195	GCCCGCGCGGAGCACGGTCT
gAC192	PRSS12	ENST00000296498.3	chr4	minus	EXP2-IR2-S2	1.17725	plus	118353179	118353198	118353198	118353003	-195	GCCCGCGCGGAGCACGGTCT
gAC192	PRSS12	ENST00000296498.3	chr4	minus	EXP2-IR3-S1	1.0899	plus	118353179	118353198	118353198	118353003	-195	GCCCGCGCGGAGCACGGTCT
gAC192	PRSS12	ENST00000296498.3	chr4	minus	EXP2-IR3-S2	1.00207	plus	118353179	118353198	118353198	118353003	-195	GCCCGCGCGGAGCACGGTCT
gAC193	PRSS12	ENST00000296498.3	chr4	minus	EXP2-IR1-S1	0.67261	minus	118353184	118353203	118353184	118353003	-181	AGCCAAGACCGTGCTCCGCG
gAC193	PRSS12	ENST00000296498.3	chr4	minus	EXP2-IR1-S2	0.6017	minus	118353184	118353203	118353184	118353003	-181	AGCCAAGACCGTGCTCCGCG
gAC193	PRSS12	ENST00000296498.3	chr4	minus	EXP2-IR2-S1	1.01411	minus	118353184	118353203	118353184	118353003	-181	AGCCAAGACCGTGCTCCGCG
gAC193	PRSS12	ENST00000296498.3	chr4	minus	EXP2-IR2-S2	1.01488	minus	118353184	118353203	118353184	118353003	-181	AGCCAAGACCGTGCTCCGCG
gAC193	PRSS12	ENST00000296498.3	chr4	minus	EXP2-IR3-S1	0.96179	minus	118353184	118353203	118353184	118353003	-181	AGCCAAGACCGTGCTCCGCG
gAC193	PRSS12	ENST00000296498.3	chr4	minus	EXP2-IR3-S2	1.09401	minus	118353184	118353203	118353184	118353003	-181	AGCCAAGACCGTGCTCCGCG
gAC194	PRSS12	ENST00000296498.3	chr4	minus	EXP2-IR1-S1	1.6259	minus	118353028	118353047	118353028	118353003	-25	TCGTGCCTGCGCCGCTACCT
gAC194	PRSS12	ENST00000296498.3	chr4	minus	EXP2-IR1-S2	1.38681	minus	118353028	118353047	118353028	118353003	-25	TCGTGCCTGCGCCGCTACCT
gAC194	PRSS12	ENST00000296498.3	chr4	minus	EXP2-IR2-S1	3.68415	minus	118353028	118353047	118353028	118353003	-25	TCGTGCCTGCGCCGCTACCT
gAC194	PRSS12	ENST00000296498.3	chr4	minus	EXP2-IR2-S2	2.2132	minus	118353028	118353047	118353028	118353003	-25	TCGTGCCTGCGCCGCTACCT
gAC194	PRSS12	ENST00000296498.3	chr4	minus	EXP2-IR3-S1	2.55381	minus	118353028	118353047	118353028	118353003	-25	TCGTGCCTGCGCCGCTACCT
gAC194	PRSS12	ENST00000296498.3	chr4	minus	EXP2-IR3-S2	2.50332	minus	118353028	118353047	118353028	118353003	-25	TCGTGCCTGCGCCGCTACCT
gAC195	PRSS12	ENST00000296498.3	chr4	minus	EXP2-IR1-S1	1.54732	minus	118352843	118352862	118352843	118353003	160	AGGCGAGGGCGGTCCGCGTG
gAC195	PRSS12	ENST00000296498.3	chr4	minus	EXP2-IR1-S2	1.90081	minus	118352843	118352862	118352843	118353003	160	AGGCGAGGGCGGTCCGCGTG
gAC195	PRSS12	ENST00000296498.3	chr4	minus	EXP2-IR2-S1	2.30886	minus	118352843	118352862	118352843	118353003	160	AGGCGAGGGCGGTCCGCGTG
gAC195	PRSS12	ENST00000296498.3	chr4	minus	EXP2-IR2-S2	2.06143	minus	118352843	118352862	118352843	118353003	160	AGGCGAGGGCGGTCCGCGTG
gAC195	PRSS12	ENST00000296498.3	chr4	minus	EXP2-IR3-S1	1.95076	minus	118352843	118352862	118352843	118353003	160	AGGCGAGGGCGGTCCGCGTG
gAC195	PRSS12	ENST00000296498.3	chr4	minus	EXP2-IR3-S2	4.51156	minus	118352843	118352862	118352843	118353003	160	AGGCGAGGGCGGTCCGCGTG
gAC196	PRSS12	ENST00000296498.3	chr4	minus	EXP2-IR1-S1	0.7274	minus	118352757	118352776	118352757	118353003	246	CCGCTCCAAGCCCGAGAAGC
gAC196	PRSS12	ENST00000296498.3	chr4	minus	EXP2-IR1-S2	0.60695	minus	118352757	118352776	118352757	118353003	246	CCGCTCCAAGCCCGAGAAGC
gAC196	PRSS12	ENST00000296498.3	chr4	minus	EXP2-IR2-S1	1.37793	minus	118352757	118352776	118352757	118353003	246	CCGCTCCAAGCCCGAGAAGC
gAC196	PRSS12	ENST00000296498.3	chr4	minus	EXP2-IR2-S2	0.88668	minus	118352757	118352776	118352757	118353003	246	CCGCTCCAAGCCCGAGAAGC
gAC196	PRSS12	ENST00000296498.3	chr4	minus	EXP2-IR3-S1	1.41647	minus	118352757	118352776	118352757	118353003	246	CCGCTCCAAGCCCGAGAAGC
gAC196	PRSS12	ENST00000296498.3	chr4	minus	EXP2-IR3-S2	1.17055	minus	118352757	118352776	118352757	118353003	246	CCGCTCCAAGCCCGAGAAGC
gAC197	SOX11	ENST00000322002.4	chr2	plus	EXP2-IR1-S1	8.82311	minus	5692224	5692243	5692224	5692384	-160	CCGGGCTGCTTTGCAAAGAT
gAC197	SOX11	ENST00000322002.4	chr2	plus	EXP2-IR1-S2	18.2671	minus	5692224	5692243	5692224	5692384	-160	CCGGGCTGCTTTGCAAAGAT
gAC197	SOX11	ENST00000322002.4	chr2	plus	EXP2-IR2-S1	12.7526	minus	5692224	5692243	5692224	5692384	-160	CCGGGCTGCTTTGCAAAGAT
gAC197	SOX11	ENST00000322002.4	chr2	plus	EXP2-IR2-S2	11.4584	minus	5692224	5692243	5692224	5692384	-160	CCGGGCTGCTTTGCAAAGAT
gAC197	SOX11	ENST00000322002.4	chr2	plus	EXP2-IR3-S1	20.1924	minus	5692224	5692243	5692224	5692384	-160	CCGGGCTGCTTTGCAAAGAT
gAC197	SOX11	ENST00000322002.4	chr2	plus	EXP2-IR3-S2	13.9775	minus	5692224	5692243	5692224	5692384	-160	CCGGGCTGCTTTGCAAAGAT
gAC198	SOX11	ENST00000322002.4	chr2	plus	EXP2-IR1-S1	8.94921	minus	5692269	5692288	5692269	5692384	-115	ATCTTCCTTTATTAACTCGG
gAC198	SOX11	ENST00000322002.4	chr2	plus	EXP2-IR1-S2	1.68868	minus	5692269	5692288	5692269	5692384	-115	ATCTTCCTTTATTAACTCGG
gAC198	SOX11	ENST00000322002.4	chr2	plus	EXP2-IR2-S1	6.93658	minus	5692269	5692288	5692269	5692384	-115	ATCTTCCTTTATTAACTCGG
gAC198	SOX11	ENST00000322002.4	chr2	plus	EXP2-IR2-S2	2.5977	minus	5692269	5692288	5692269	5692384	-115	ATCTTCCTTTATTAACTCGG
gAC198	SOX11	ENST00000322002.4	chr2	plus	EXP2-IR3-S1	2.45831	minus	5692269	5692288	5692269	5692384	-115	ATCTTCCTTTATTAACTCGG
gAC198	SOX11	ENST00000322002.4	chr2	plus	EXP2-IR3-S2	3.85734	minus	5692269	5692288	5692269	5692384	-115	ATCTTCCTTTATTAACTCGG
gAC199	SOX11	ENST00000322002.4	chr2	plus	EXP2-IR1-S1	1.12316	minus	5692351	5692370	5692351	5692384	-33	CTCTCTCTCAACTAGTTATC
gAC199	SOX11	ENST00000322002.4	chr2	plus	EXP2-IR1-S2	6.51958	minus	5692351	5692370	5692351	5692384	-33	CTCTCTCTCAACTAGTTATC
gAC199	SOX11	ENST00000322002.4	chr2	plus	EXP2-IR2-S1	1.67779	minus	5692351	5692370	5692351	5692384	-33	CTCTCTCTCAACTAGTTATC
gAC199	SOX11	ENST00000322002.4	chr2	plus	EXP2-IR2-S2	2.08513	minus	5692351	5692370	5692351	5692384	-33	CTCTCTCTCAACTAGTTATC
gAC199	SOX11	ENST00000322002.4	chr2	plus	EXP2-IR3-S1	4.03673	minus	5692351	5692370	5692351	5692384	-33	CTCTCTCTCAACTAGTTATC
gAC199	SOX11	ENST00000322002.4	chr2	plus	EXP2-IR3-S2	4.83641	minus	5692351	5692370	5692351	5692384	-33	CTCTCTCTCAACTAGTTATC
gAC200	SOX11	ENST00000322002.4	chr2	plus	EXP2-IR1-S1	3.86095	minus	5692532	5692551	5692532	5692384	148	TGTGGTGGCTTCGGCGACGA
gAC200	SOX11	ENST00000322002.4	chr2	plus	EXP2-IR1-S2	7.96749	minus	5692532	5692551	5692532	5692384	148	TGTGGTGGCTTCGGCGACGA
gAC200	SOX11	ENST00000322002.4	chr2	plus	EXP2-IR2-S1	1.76155	minus	5692532	5692551	5692532	5692384	148	TGTGGTGGCTTCGGCGACGA
gAC200	SOX11	ENST00000322002.4	chr2	plus	EXP2-IR2-S2	2.23836	minus	5692532	5692551	5692532	5692384	148	TGTGGTGGCTTCGGCGACGA
gAC200	SOX11	ENST00000322002.4	chr2	plus	EXP2-IR3-S1	2.6506	minus	5692532	5692551	5692532	5692384	148	TGTGGTGGCTTCGGCGACGA
gAC200	SOX11	ENST00000322002.4	chr2	plus	EXP2-IR3-S2	1.00075	minus	5692532	5692551	5692532	5692384	148	TGTGGTGGCTTCGGCGACGA
gAC201	SOX11	ENST00000322002.4	chr2	plus	EXP2-IR1-S1	3.79149	plus	5692597	5692616	5692616	5692384	232	GCCGCGAAAGCGGGGTGCCG
gAC201	SOX11	ENST00000322002.4	chr2	plus	EXP2-IR1-S2	2.25903	plus	5692597	5692616	5692616	5692384	232	GCCGCGAAAGCGGGGTGCCG
gAC201	SOX11	ENST00000322002.4	chr2	plus	EXP2-IR2-S1	2.3159	plus	5692597	5692616	5692616	5692384	232	GCCGCGAAAGCGGGGTGCCG
gAC201	SOX11	ENST00000322002.4	chr2	plus	EXP2-IR2-S2	0.07987	plus	5692597	5692616	5692616	5692384	232	GCCGCGAAAGCGGGGTGCCG
gAC201	SOX11	ENST00000322002.4	chr2	plus	EXP2-IR3-S1	0.83718	plus	5692597	5692616	5692616	5692384	232	GCCGCGAAAGCGGGGTGCCG
gAC201	SOX11	ENST00000322002.4	chr2	plus	EXP2-IR3-S2	2.90039	plus	5692597	5692616	5692616	5692384	232	GCCGCGAAAGCGGGGTGCCG
gAC075	TGFBR1	ENST00000374994.8	chr9	plus	E2IR1S1	1.67277	minus	99104918	99104937	99104918	99105113	-195	CCACGCCCCACGCTCCCCGG
gAC075	TGFBR1	ENST00000374994.8	chr9	plus	E2IR1S2	2.32558	minus	99104918	99104937	99104918	99105113	-195	CCACGCCCCACGCTCCCCGG
gAC075	TGFBR1	ENST00000374994.8	chr9	plus	E2IR2S1	2.29845	minus	99104918	99104937	99104918	99105113	-195	CCACGCCCCACGCTCCCCGG
gAC075	TGFBR1	ENST00000374994.8	chr9	plus	E2IR2S2	2.84701	minus	99104918	99104937	99104918	99105113	-195	CCACGCCCCACGCTCCCCGG
gAC075	TGFBR1	ENST00000374994.8	chr9	plus	E2IR3S1	2.31267	minus	99104918	99104937	99104918	99105113	-195	CCACGCCCCACGCTCCCCGG
gAC075	TGFBR1	ENST00000374994.8	chr9	plus	E2IR3S2	2.2477	minus	99104918	99104937	99104918	99105113	-195	CCACGCCCCACGCTCCCCGG
gAC075	TGFBR1	ENST00000374994.8	chr9	plus	E2IR4S1	2.02193	minus	99104918	99104937	99104918	99105113	-195	CCACGCCCCACGCTCCCCGG
gAC075	TGFBR1	ENST00000374994.8	chr9	plus	E2IR4S2	1.93877	minus	99104918	99104937	99104918	99105113	-195	CCACGCCCCACGCTCCCCGG
gAC075	TGFBR1	ENST00000374994.8	chr9	plus	E3IR1S1	1.85271	minus	99104918	99104937	99104918	99105113	-195	CCACGCCCCACGCTCCCCGG
gAC075	TGFBR1	ENST00000374994.8	chr9	plus	E3IR1S2	1.67307	minus	99104918	99104937	99104918	99105113	-195	CCACGCCCCACGCTCCCCGG
gAC075	TGFBR1	ENST00000374994.8	chr9	plus	E3IR2S1	1.93003	minus	99104918	99104937	99104918	99105113	-195	CCACGCCCCACGCTCCCCGG
gAC075	TGFBR1	ENST00000374994.8	chr9	plus	E3IR2S2	1.96622	minus	99104918	99104937	99104918	99105113	-195	CCACGCCCCACGCTCCCCGG
gAC075	TGFBR1	ENST00000374994.8	chr9	plus	E3IR3S1	1.55448	minus	99104918	99104937	99104918	99105113	-195	CCACGCCCCACGCTCCCCGG
gAC075	TGFBR1	ENST00000374994.8	chr9	plus	E3IR3S2	1.72297	minus	99104918	99104937	99104918	99105113	-195	CCACGCCCCACGCTCCCCGG
gAC076	TGFBR1	ENST00000374994.8	chr9	plus	E1IR1S1	1.25702	plus	99104954	99104973	99104973	99105113	-140	GCGGCTGCGGATTGGCTGCC
gAC076	TGFBR1	ENST00000374994.8	chr9	plus	E1IR1S2	1.5156	plus	99104954	99104973	99104973	99105113	-140	GCGGCTGCGGATTGGCTGCC
gAC076	TGFBR1	ENST00000374994.8	chr9	plus	E1IR2S1	1.3471	plus	99104954	99104973	99104973	99105113	-140	GCGGCTGCGGATTGGCTGCC
gAC076	TGFBR1	ENST00000374994.8	chr9	plus	E1IR2S2	1.33428	plus	99104954	99104973	99104973	99105113	-140	GCGGCTGCGGATTGGCTGCC
gAC076	TGFBR1	ENST00000374994.8	chr9	plus	E1IR3S1	1.21996	plus	99104954	99104973	99104973	99105113	-140	GCGGCTGCGGATTGGCTGCC
gAC076	TGFBR1	ENST00000374994.8	chr9	plus	E1IR3S2	1.19231	plus	99104954	99104973	99104973	99105113	-140	GCGGCTGCGGATTGGCTGCC
gAC077	TGFBR1	ENST00000374994.8	chr9	plus	E2IR1S1	1.11519	minus	99105011	99105030	99105011	99105113	-102	CGCCGCCGCGAGCTGCCAAG
gAC077	TGFBR1	ENST00000374994.8	chr9	plus	E2IR1S2	0.84347	minus	99105011	99105030	99105011	99105113	-102	CGCCGCCGCGAGCTGCCAAG
gAC077	TGFBR1	ENST00000374994.8	chr9	plus	E2IR2S1	1.25439	minus	99105011	99105030	99105011	99105113	-102	CGCCGCCGCGAGCTGCCAAG
gAC077	TGFBR1	ENST00000374994.8	chr9	plus	E2IR2S2	0.841925	minus	99105011	99105030	99105011	99105113	-102	CGCCGCCGCGAGCTGCCAAG
gAC077	TGFBR1	ENST00000374994.8	chr9	plus	E2IR3S1	1.11869	minus	99105011	99105030	99105011	99105113	-102	CGCCGCCGCGAGCTGCCAAG
gAC077	TGFBR1	ENST00000374994.8	chr9	plus	E2IR3S2	1.10431	minus	99105011	99105030	99105011	99105113	-102	CGCCGCCGCGAGCTGCCAAG
gAC078	TGFBR1	ENST00000374994.8	chr9	plus	E1IR1S1	1.80586	plus	99105072	99105091	99105091	99105113	-22	CGTCCTCCGAGCAGTTACAA
gAC078	TGFBR1	ENST00000374994.8	chr9	plus	E1IR1S2	1.63403	plus	99105072	99105091	99105091	99105113	-22	CGTCCTCCGAGCAGTTACAA
gAC078	TGFBR1	ENST00000374994.8	chr9	plus	E1IR2S1	1.59163	plus	99105072	99105091	99105091	99105113	-22	CGTCCTCCGAGCAGTTACAA
gAC078	TGFBR1	ENST00000374994.8	chr9	plus	E1IR2S2	1.29211	plus	99105072	99105091	99105091	99105113	-22	CGTCCTCCGAGCAGTTACAA
gAC078	TGFBR1	ENST00000374994.8	chr9	plus	E1IR3S1	1.34598	plus	99105072	99105091	99105091	99105113	-22	CGTCCTCCGAGCAGTTACAA
gAC078	TGFBR1	ENST00000374994.8	chr9	plus	E1IR3S2	1.45878	plus	99105072	99105091	99105091	99105113	-22	CGTCCTCCGAGCAGTTACAA
gAC078	TGFBR1	ENST00000374994.8	chr9	plus	E2IR1S1	1.34598	plus	99105072	99105091	99105091	99105113	-22	CGTCCTCCGAGCAGTTACAA
gAC078	TGFBR1	ENST00000374994.8	chr9	plus	E2IR1S2	1.45878	plus	99105072	99105091	99105091	99105113	-22	CGTCCTCCGAGCAGTTACAA
gAC078	TGFBR1	ENST00000374994.8	chr9	plus	E2IR2S1	1.2931	plus	99105072	99105091	99105091	99105113	-22	CGTCCTCCGAGCAGTTACAA
gAC078	TGFBR1	ENST00000374994.8	chr9	plus	E2IR2S2	1.64775	plus	99105072	99105091	99105091	99105113	-22	CGTCCTCCGAGCAGTTACAA
gAC078	TGFBR1	ENST00000374994.8	chr9	plus	E2IR3S1	1.41675	plus	99105072	99105091	99105091	99105113	-22	CGTCCTCCGAGCAGTTACAA
gAC078	TGFBR1	ENST00000374994.8	chr9	plus	E2IR3S2	1.40518	plus	99105072	99105091	99105091	99105113	-22	CGTCCTCCGAGCAGTTACAA
gAC079	TGFBR1	ENST00000374994.8	chr9	plus	E2IR1S1	1.23583	minus	99105112	99105131	99105112	99105113	-1	CCGCGGCGGCTAGGGAGGTG
gAC079	TGFBR1	ENST00000374994.8	chr9	plus	E2IR1S2	1.36303	minus	99105112	99105131	99105112	99105113	-1	CCGCGGCGGCTAGGGAGGTG
gAC079	TGFBR1	ENST00000374994.8	chr9	plus	E2IR2S1	1.4331	minus	99105112	99105131	99105112	99105113	-1	CCGCGGCGGCTAGGGAGGTG
gAC079	TGFBR1	ENST00000374994.8	chr9	plus	E2IR2S2	1.47766	minus	99105112	99105131	99105112	99105113	-1	CCGCGGCGGCTAGGGAGGTG
gAC079	TGFBR1	ENST00000374994.8	chr9	plus	E2IR4S1	1.20058	minus	99105112	99105131	99105112	99105113	-1	CCGCGGCGGCTAGGGAGGTG
gAC079	TGFBR1	ENST00000374994.8	chr9	plus	E2IR4S2	1.24393	minus	99105112	99105131	99105112	99105113	-1	CCGCGGCGGCTAGGGAGGTG
gAC080	TGFBR1	ENST00000374994.8	chr9	plus	E1IR1S1	1.04055	plus	99105145	99105164	99105164	99105113	51	GCTGGGGTGAGGCAGCGGCG
gAC080	TGFBR1	ENST00000374994.8	chr9	plus	E1IR1S2	1.13371	plus	99105145	99105164	99105164	99105113	51	GCTGGGGTGAGGCAGCGGCG
gAC080	TGFBR1	ENST00000374994.8	chr9	plus	E1IR2S1	0.952557	plus	99105145	99105164	99105164	99105113	51	GCTGGGGTGAGGCAGCGGCG
gAC080	TGFBR1	ENST00000374994.8	chr9	plus	E1IR2S2	0.895919	plus	99105145	99105164	99105164	99105113	51	GCTGGGGTGAGGCAGCGGCG
gAC080	TGFBR1	ENST00000374994.8	chr9	plus	E1IR3S1	0.824975	plus	99105145	99105164	99105164	99105113	51	GCTGGGGTGAGGCAGCGGCG
gAC080	TGFBR1	ENST00000374994.8	chr9	plus	E1IR3S2	0.989178	plus	99105145	99105164	99105164	99105113	51	GCTGGGGTGAGGCAGCGGCG
gAC080	TGFBR1	ENST00000374994.8	chr9	plus	E2IR1S1	0.753982	plus	99105145	99105164	99105164	99105113	51	GCTGGGGTGAGGCAGCGGCG
gAC080	TGFBR1	ENST00000374994.8	chr9	plus	E2IR1S2	1.07424	plus	99105145	99105164	99105164	99105113	51	GCTGGGGTGAGGCAGCGGCG
gAC080	TGFBR1	ENST00000374994.8	chr9	plus	E2IR2S1	0.885856	plus	99105145	99105164	99105164	99105113	51	GCTGGGGTGAGGCAGCGGCG
gAC080	TGFBR1	ENST00000374994.8	chr9	plus	E2IR2S2	1.0286	plus	99105145	99105164	99105164	99105113	51	GCTGGGGTGAGGCAGCGGCG
gAC081	TGFBR1	ENST00000374994.8	chr9	plus	E1IR1S1	1.00836	plus	99105241	99105260	99105260	99105113	147	GCTCCTCCTCGTGCTGGCGG
gAC081	TGFBR1	ENST00000374994.8	chr9	plus	E1IR1S2	1.46802	plus	99105241	99105260	99105260	99105113	147	GCTCCTCCTCGTGCTGGCGG
gAC081	TGFBR1	ENST00000374994.8	chr9	plus	E1IR2S1	1.13229	plus	99105241	99105260	99105260	99105113	147	GCTCCTCCTCGTGCTGGCGG
gAC081	TGFBR1	ENST00000374994.8	chr9	plus	E1IR2S2	0.940693	plus	99105241	99105260	99105260	99105113	147	GCTCCTCCTCGTGCTGGCGG
gAC081	TGFBR1	ENST00000374994.8	chr9	plus	E1IR3S1	0.913196	plus	99105241	99105260	99105260	99105113	147	GCTCCTCCTCGTGCTGGCGG
gAC081	TGFBR1	ENST00000374994.8	chr9	plus	E1IR3S2	0.792987	plus	99105241	99105260	99105260	99105113	147	GCTCCTCCTCGTGCTGGCGG
gAC081	TGFBR1	ENST00000374994.8	chr9	plus	E2IR1S1	0.750232	plus	99105241	99105260	99105260	99105113	147	GCTCCTCCTCGTGCTGGCGG
gAC081	TGFBR1	ENST00000374994.8	chr9	plus	E2IR1S2	0.978131	plus	99105241	99105260	99105260	99105113	147	GCTCCTCCTCGTGCTGGCGG
gAC081	TGFBR1	ENST00000374994.8	chr9	plus	E2IR2S1	1.20507	plus	99105241	99105260	99105260	99105113	147	GCTCCTCCTCGTGCTGGCGG
gAC081	TGFBR1	ENST00000374994.8	chr9	plus	E2IR2S2	1.15059	plus	99105241	99105260	99105260	99105113	147	GCTCCTCCTCGTGCTGGCGG
gAC081	TGFBR1	ENST00000374994.8	chr9	plus	E2IR4S1	1.00302	plus	99105241	99105260	99105260	99105113	147	GCTCCTCCTCGTGCTGGCGG
gAC081	TGFBR1	ENST00000374994.8	chr9	plus	E2IR4S2	1.32479	plus	99105241	99105260	99105260	99105113	147	GCTCCTCCTCGTGCTGGCGG
gAC082	TGFBR1	ENST00000374994.8	chr9	plus	E2IR1S1	0.751341	plus	99105296	99105315	99105315	99105113	202	GCGACGGGTGAGCGGCGGCG
gAC082	TGFBR1	ENST00000374994.8	chr9	plus	E2IR1S2	0.859558	plus	99105296	99105315	99105315	99105113	202	GCGACGGGTGAGCGGCGGCG
gAC082	TGFBR1	ENST00000374994.8	chr9	plus	E2IR2S1	1.38199	plus	99105296	99105315	99105315	99105113	202	GCGACGGGTGAGCGGCGGCG
gAC082	TGFBR1	ENST00000374994.8	chr9	plus	E2IR2S2	1.24813	plus	99105296	99105315	99105315	99105113	202	GCGACGGGTGAGCGGCGGCG
gAC082	TGFBR1	ENST00000374994.8	chr9	plus	E2IR3S1	0.906663	plus	99105296	99105315	99105315	99105113	202	GCGACGGGTGAGCGGCGGCG
gAC082	TGFBR1	ENST00000374994.8	chr9	plus	E2IR3S2	1.2105	plus	99105296	99105315	99105315	99105113	202	GCGACGGGTGAGCGGCGGCG
gAC170	TGFBR1	ENST00000374994.8	chr9	plus	E3IR1S1	4.27717	minus	99104876	99104895	99104876	99105113	-237	GCCCCGGCCCGATCGGCTCC
gAC170	TGFBR1	ENST00000374994.8	chr9	plus	E3IR1S2	4.36474	minus	99104876	99104895	99104876	99105113	-237	GCCCCGGCCCGATCGGCTCC
gAC170	TGFBR1	ENST00000374994.8	chr9	plus	E3IR2S1	3.01422	minus	99104876	99104895	99104876	99105113	-237	GCCCCGGCCCGATCGGCTCC
gAC170	TGFBR1	ENST00000374994.8	chr9	plus	E3IR2S2	3.10962	minus	99104876	99104895	99104876	99105113	-237	GCCCCGGCCCGATCGGCTCC
gAC170	TGFBR1	ENST00000374994.8	chr9	plus	E3IR3S1	2.20784	minus	99104876	99104895	99104876	99105113	-237	GCCCCGGCCCGATCGGCTCC
gAC170	TGFBR1	ENST00000374994.8	chr9	plus	E3IR3S2	2.68689	minus	99104876	99104895	99104876	99105113	-237	GCCCCGGCCCGATCGGCTCC
gAC171	TGFBR1	ENST00000374994.8	chr9	plus	E3IR1S1	3.77969	plus	99104854	99104873	99104873	99105113	-240	CCCACGCGGCCTCTCGGAGC
gAC171	TGFBR1	ENST00000374994.8	chr9	plus	E3IR1S2	3.99234	plus	99104854	99104873	99104873	99105113	-240	CCCACGCGGCCTCTCGGAGC
gAC171	TGFBR1	ENST00000374994.8	chr9	plus	E3IR2S1	4.19019	plus	99104854	99104873	99104873	99105113	-240	CCCACGCGGCCTCTCGGAGC
gAC171	TGFBR1	ENST00000374994.8	chr9	plus	E3IR2S2	4.91523	plus	99104854	99104873	99104873	99105113	-240	CCCACGCGGCCTCTCGGAGC
gAC171	TGFBR1	ENST00000374994.8	chr9	plus	E3IR3S1	2.52073	plus	99104854	99104873	99104873	99105113	-240	CCCACGCGGCCTCTCGGAGC
gAC171	TGFBR1	ENST00000374994.8	chr9	plus	E3IR3S2	2.6507	plus	99104854	99104873	99104873	99105113	-240	CCCACGCGGCCTCTCGGAGC
