# Supplementary material for: Predicting the effect of CRISPR-Cas9-based epigenome editing
Source: eLife. 2026 Jan 12;12:RP92991. doi: 10.7554/eLife.92991 (PMC12795505; doi:10.7554/eLife.92991)
Supplement: Figure 6—source data 2. — This table includes measurements with corresponding sgRNA used and their distance with respect to the TSS. Gene information and amplicon centerpoint distance to the TSS. [file elife-92991-fig6-data2.xlsx]

## Sheet: Sheet3
target gene	gRNA ID	gRNA targeting position wrt TSS	amplicon centerpoint wrt TSS	H3K27ac fold enrichment	Sample id
CXCR4	gpJL111	-170	-846	2.87774	EXP1-S1
CXCR4	gpJL111	-170	-846	2.85776	EXP2-S1
CXCR4	gpJL111	-170	-846	2.22003	EXP3-S1
CXCR4	gpJL111	-170	-609	2.87774	EXP1-S2
CXCR4	gpJL111	-170	-609	2.85776	EXP2-S2
CXCR4	gpJL111	-170	-609	2.22003	EXP3-S2
CXCR4	gpJL111	-170	-350	2.34328	EXP1-S3
CXCR4	gpJL111	-170	-350	2.50342	EXP2-S3
CXCR4	gpJL111	-170	-350	2.0557	EXP3-S3
CXCR4	gpJL111	-170	-238	1.99493	EXP1-S4
CXCR4	gpJL111	-170	-238	2.20528	EXP2-S4
CXCR4	gpJL111	-170	-238	1.68989	EXP3-S4
CXCR4	gpJL111	-170	-70	2.6983	EXP1-S5
CXCR4	gpJL111	-170	-70	3.39603	EXP2-S5
CXCR4	gpJL111	-170	-70	2.75947	EXP3-S5
CXCR4	gAC127	-201	-846	5.67117	EXP1-S1
CXCR4	gAC127	-201	-846	2.81326	EXP2-S1
CXCR4	gAC127	-201	-846	2.28819	EXP3-S1
CXCR4	gAC127	-201	-609	5.67117	EXP1-S2
CXCR4	gAC127	-201	-609	2.81326	EXP2-S2
CXCR4	gAC127	-201	-609	2.28819	EXP3-S2
CXCR4	gAC127	-201	-350	5.45463	EXP1-S3
CXCR4	gAC127	-201	-350	2.73073	EXP2-S3
CXCR4	gAC127	-201	-350	1.98658	EXP3-S3
CXCR4	gAC127	-201	-238	4.78537	EXP1-S4
CXCR4	gAC127	-201	-238	2.15502	EXP2-S4
CXCR4	gAC127	-201	-238	1.92874	EXP3-S4
CXCR4	gAC127	-201	-70	5.64891	EXP1-S5
CXCR4	gAC127	-201	-70	3.37278	EXP2-S5
CXCR4	gAC127	-201	-70	2.59192	EXP3-S5
CXCR4	gAC138	-34	-846	3.67065	EXP1-S1
CXCR4	gAC138	-34	-846	5.61591	EXP2-S1
CXCR4	gAC138	-34	-846	3.22646	EXP3-S1
CXCR4	gAC138	-34	-609	3.67065	EXP1-S2
CXCR4	gAC138	-34	-609	5.61591	EXP2-S2
CXCR4	gAC138	-34	-609	3.22646	EXP3-S2
CXCR4	gAC138	-34	-350	2.95495	EXP1-S3
CXCR4	gAC138	-34	-350	4.75349	EXP2-S3
CXCR4	gAC138	-34	-350	2.4163	EXP3-S3
CXCR4	gAC138	-34	-238	3.91043	EXP1-S4
CXCR4	gAC138	-34	-238	5.60326	EXP2-S4
CXCR4	gAC138	-34	-238	3.04653	EXP3-S4
CXCR4	gAC138	-34	-70	4.07482	EXP1-S5
CXCR4	gAC138	-34	-70	6.29684	EXP2-S5
CXCR4	gAC138	-34	-70	3.07157	EXP3-S5
TGFBR1	gAC075	-195	-749	9.67023	EXP4-S1
TGFBR1	gAC075	-195	-749	8.20809	EXP5-S1
TGFBR1	gAC075	-195	-749	1.54432	EXP6-S1
TGFBR1	gAC075	-195	-447	12.1757	EXP4-S2
TGFBR1	gAC075	-195	-447	8.42295	EXP5-S2
TGFBR1	gAC075	-195	-447	2.2775	EXP6-S2
TGFBR1	gAC075	-195	-355	10.7815	EXP4-S3
TGFBR1	gAC075	-195	-355	6.6588	EXP5-S3
TGFBR1	gAC075	-195	-355	1.78095	EXP6-S3
TGFBR1	gAC075	-195	-238	6.44884	EXP4-S4
TGFBR1	gAC075	-195	-238	4.53582	EXP5-S4
TGFBR1	gAC075	-195	-238	0.953572	EXP6-S4
TGFBR1	gAC078	-22	-749	2.27643	EXP4-S1
TGFBR1	gAC078	-22	-749	4.53509	EXP5-S1
TGFBR1	gAC078	-22	-749	3.44143	EXP6-S1
TGFBR1	gAC078	-22	-447	2.45889	EXP4-S2
TGFBR1	gAC078	-22	-447	5.21432	EXP5-S2
TGFBR1	gAC078	-22	-447	3.05415	EXP6-S2
TGFBR1	gAC078	-22	-355	1.89328	EXP4-S3
TGFBR1	gAC078	-22	-355	5.4431	EXP5-S3
TGFBR1	gAC078	-22	-355	5.17503	EXP6-S3
TGFBR1	gAC078	-22	-238	0.243348	EXP4-S4
TGFBR1	gAC078	-22	-238	1.26972	EXP5-S4
TGFBR1	gAC078	-22	-238	2.54877	EXP6-S4
TGFBR1	gAC170	-237	-749	11.0541	EXP4-S1
TGFBR1	gAC170	-237	-749	9.52296	EXP5-S1
TGFBR1	gAC170	-237	-749	5.07934	EXP6-S1
TGFBR1	gAC170	-237	-447	17.8213	EXP4-S2
TGFBR1	gAC170	-237	-447	7.74352	EXP5-S2
TGFBR1	gAC170	-237	-447	4.67738	EXP6-S2
TGFBR1	gAC170	-237	-355	14.7653	EXP4-S3
TGFBR1	gAC170	-237	-355	7.71869	EXP5-S3
TGFBR1	gAC170	-237	-355	6.79911	EXP6-S3
TGFBR1	gAC170	-237	-238	8.69071	EXP4-S4
TGFBR1	gAC170	-237	-238	40.1722	EXP5-S4
TGFBR1	gAC170	-237	-238	8.3678	EXP6-S4
TGFBR1	gAC171	-240	-749	15.0679	EXP4-S1
TGFBR1	gAC171	-240	-749	4.84812	EXP5-S1
TGFBR1	gAC171	-240	-749	1.86352	EXP6-S1
TGFBR1	gAC171	-240	-447	13.5762	EXP4-S2
TGFBR1	gAC171	-240	-447	6.31834	EXP5-S2
TGFBR1	gAC171	-240	-447	2.73928	EXP6-S2
TGFBR1	gAC171	-240	-355	17.5007	EXP4-S3
TGFBR1	gAC171	-240	-355	8.20408	EXP5-S3
TGFBR1	gAC171	-240	-355	1.99327	EXP6-S3
TGFBR1	gAC171	-240	-238	6.28524	EXP4-S4
TGFBR1	gAC171	-240	-238	3.0077	EXP5-S4
TGFBR1	gAC171	-240	-238	1.2992	EXP6-S4
