# Supplementary material for: Predicting the effect of CRISPR-Cas9-based epigenome editing
Source: eLife. 2026 Jan 12;12:RP92991. doi: 10.7554/eLife.92991 (PMC12795505; doi:10.7554/eLife.92991)
Supplement: Figure 6—source data 3. — CUT&RUN primers have their corresponding genomic coordinates reported corresponding to the regions they amplify. [file elife-92991-fig6-data3.xlsx]

## Sheet: Sheet1
target gene	sequence	direction	purpose	genomic coordinates
C2CD4B	GCTCCTCGAGAAACTCTGTTC	Forward	qPCR
C2CD4B	GATTCGGCGTGAGCACTTT	Reverse	qPCR
CD79A	CAAGAACCGAATCATCACAGCC	Forward	qPCR
CD79A	TCTGCCATCGTTTCCTGAACA	Reverse	qPCR
CXCR4	CTCCGGGCTTATTTGCTGGT	Forward	CUT&RUN qPCR	chr2:136118902-136119086
CXCR4	TGAGTGATTCTGTGCAAGTTCCT	Reverse	CUT&RUN qPCR	chr2:136118902-136119086
CXCR4	TCGCGAATTGGTTACCGCTA	Forward	CUT&RUN qPCR	chr2:136118694-136118824
CXCR4	TCTGCACCTGACCCTAGTGA	Reverse	CUT&RUN qPCR	chr2:136118694-136118824
CXCR4	CGTTGGAAGCTTGGCCCTAC	Forward	CUT&RUN qPCR	chr2:136118404-136118594
CXCR4	GCTTCCCACCTGTCTTCAGG	Reverse	CUT&RUN qPCR	chr2:136118404-136118594
CXCR4	CAGAGAGACGCGTTCCTAGC	Forward	CUT&RUN qPCR	chr2:136118328-136118447
CXCR4	GGACTCACTACCGACCACCC	Reverse	CUT&RUN qPCR	chr2:136118328-136118447
CXCR4	TAGCAAAGTGACGCCGAGG	Forward	CUT&RUN qPCR	chr2:136118131-136118308
CXCR4	TTGAACTTAGAGCGCAGCCC	Reverse	CUT&RUN qPCR	chr2:136118131-136118308
CXCR4	ACTACACCGAGGAAATGGGCT	Forward	qPCR
CXCR4	CCCACAATGCCAGTTAAGAAGA	Reverse	qPCR
CYP17A1	GCATCATAGACAACCTGAGCAA	Forward	qPCR
CYP17A1	GGGTTTTGTTGGGGAAAATC	Reverse	qPCR
GAPDH	CAATGACCCCTTCATTGACC	Forward	qPCR
GAPDH	TTGATTTTGGAGGGATCTCG	Reverse	qPCR
MYO1G	CAAACCTGACTTTGTGCTTTTGG	Forward	qPCR
MYO1G	GGCCCTTCTCGAACCTGAG	Reverse	qPCR
PRSS12	TTGGATGAAGTACGCTGCAC	Forward	qPCR
PRSS12	CCCCACTGGCCTCTGTAATA	Reverse	qPCR
SOX11	CATGTAGACTAATGCAGCCATTGG	Forward	qPCR
SOX11	CACGGAGCACGTGTCAATTG	Reverse	qPCR
TGFBR1	GATCCTCCCTTTCCAACCTG	Forward	CUT&RUN qPCR	chr9:99104302-99104426
TGFBR1	GTGTTTGGGCTCAGGATCTG	Reverse	CUT&RUN qPCR	chr9:99104302-99104426
TGFBR1	GGAAGTTGAAGTGGATGCAG	Forward	CUT&RUN qPCR	chr9:99104594-99104738
TGFBR1	GCCTAGAGGAGGTTAGAAGAAA	Reverse	CUT&RUN qPCR	chr9:99104594-99104738
TGFBR1	CGCGCCTAGAGGAGGTTAGA	Forward	CUT&RUN qPCR	chr9:99104713-99104802
TGFBR1	GACACACCCATCGCTCTACC	Reverse	CUT&RUN qPCR	chr9:99104713-99104802
TGFBR1	AGACACACCCATCGCTCTAC	Forward	CUT&RUN qPCR	chr9:99104782-99104973
TGFBR1	TCGCGGCTGCGGATTGG	Reverse	CUT&RUN qPCR	chr9:99104782-99104973
TGFBR1	GCAGAGCTGTGAAGCCTTGAGA	Forward	qPCR
TGFBR1	TGCCTTCCTGTTGACTGAGTTG	Reverse	qPCR
uidA	CAACGAACTGAACTGGCAGA	Forward	qPCR
uidA	CATTACGCTGCGATGGAT	Reverse	qPCR
